# MIND TO MIND

Creative writing that explores the abstract side of our profession and our lives

*Stephen T. Harvey, M.D., Editor*

## **Bacchus Listed for a Liver Transplant**

Douglas L. Hester, M.D., M.F.A.

He staggers in his toga, jovial  
but jaundiced. His flagging liver struggles under  
the load. His hands twitch, palms redder  
than wine. But Bacchus' cup remains full.  
He toasts MELD scores, organ transplants.  
"Glorious, glorious! What surgeons have—hic—  
done! Here's to hepatocytes, which  
happily relocate. Such advances  
demand another round." Tonight Bacchus  
drowns the fact a life must soon be taken  
early: some family will gift him the liver  
from a brain-dead body playing host  
to second chances. Vats of crushed grapes  
make this batch full-bodied, but bitter.

From the Department of Anesthesiology, Vanderbilt University Medical Center, Nashville, Tennessee. Doug.hester@vumc.org.

Accepted for publication May 13, 2019.

Permission to reprint granted to the American Society of Anesthesiologists, Inc. by copyright author/owner. Anesthesiology 2019; 131:1192. DOI: 10.1097/ALN.0000000000002844
